# Supplementary material for: Effect of Hydralazine on Angiotensin II-Induced Abdominal Aortic Aneurysm in Apolipoprotein E-Deficient Mice
Source: Int J Mol Sci. 2023 Nov 3;24(21):15955. doi: 10.3390/ijms242115955 (PMC10650676; doi:10.3390/ijms242115955)
Supplement: Supplementary file 1 [file ijms-24-15955-s001.zip › ijms-2544256-supplementary.pdf]

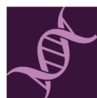

*Supplementary figures and tables*

# Effect of hydralazine on angiotensin II-induced abdominal aortic aneurysm in apolipoprotein E-deficient mice

Yutang Wang <sup>1,\*</sup>, Owen Sargisson <sup>1,†</sup>, Dinh Tam Nguyen <sup>1</sup>, Ketura Parker <sup>1</sup>, Stephan J.R. Pyke <sup>1</sup>, Ahmed Alramahi <sup>1</sup>, Liam Thihlum <sup>1</sup>, Yan Fang <sup>1</sup>, Morgan E. Wallace <sup>1</sup>, Stuart P. Berzins <sup>1</sup>, Ernesto Oqueli <sup>2,3</sup>, Dianna J. Magliano <sup>4,\*</sup>, Jonathan Golledge <sup>5,6</sup>

- 1 Discipline of Life Science, Institute of Innovation, Science and Sustainability, Federation University Australia, Ballarat, VIC, Australia.
- 2 Cardiology Department, Grampians Health Ballarat, Ballarat, VIC, Australia
- 3 School of Medicine, Faculty of Health, Deakin University, Geelong, VIC, Australia
- 4 Diabetes and Population Health, Baker Heart and Diabetes Institute, Melbourne, VIC, Australia
- 5 Queensland Research Centre for Peripheral Vascular Disease, College of Medicine and Dentistry, James Cook University, Townsville, QLD, Australia
- 6 Department of Vascular and Endovascular Surgery, The Townsville University Hospital, Townsville, QLD, Australia

\* Correspondence: yutang.wang@federation.edu.au or Dianna.Magliano@baker.edu.au

† These authors contributed equally to this work.

**Table S1:** List of mouse primer sequences.

| Name          | Forward primer               | Reverse primer                  |
|---------------|------------------------------|---------------------------------|
| Caspase 3     | 5'-CGTGGTTCATCCAGTCCCTTT-3'  | 5'-ATTCCGTTGCCACCTTCCT-3'       |
| Caspase 8     | 5'-TCTACCCTCCAGCTCTCTGT-3'   | 5'-AGAGGTAGAAGAGCTGTAACCTTAT-3' |
| Caspase 9     | 5'-ACCTTCCCAGGTTGCCAATG-3'   | 5'-CCCCGAGCCTCATGAAGTTTT-3'     |
| EEF2          | 5'-ACATGTCAGTGATCGCCCAT-3'   | 5'-GAGATGGTGGTGGATTTGATTG-3'    |
| IFN $\gamma$  | 5'-TGGCTGTTTCTGGCTGTTACT-3'  | 5'-TCATGTCACCATCCTTTTGCCA-3'    |
| IL-1          | 5'-GCCACCTTTTGACAGTGATGAA-3' | 5'-GACAGCCCAGGTCAAAGGTT-3'      |
| IL-6          | 5'-CGGCCTTCCCTACTTCACAA-3'   | 5'-GCCATTGCACAACCTTTTCTCA-3'    |
| TNF- $\alpha$ | 5'-TAGCCACGTCGTAGCAAAC-3'    | 5'-ACAAGGTACAACCCATCGGC-3'      |

Abbreviations: EEF2, eukaryotic translation elongation factor 2; IFN $\gamma$ , interferon-gamma; IL, interleukin; TNF- $\alpha$ , tumor necrosis factor-alpha.

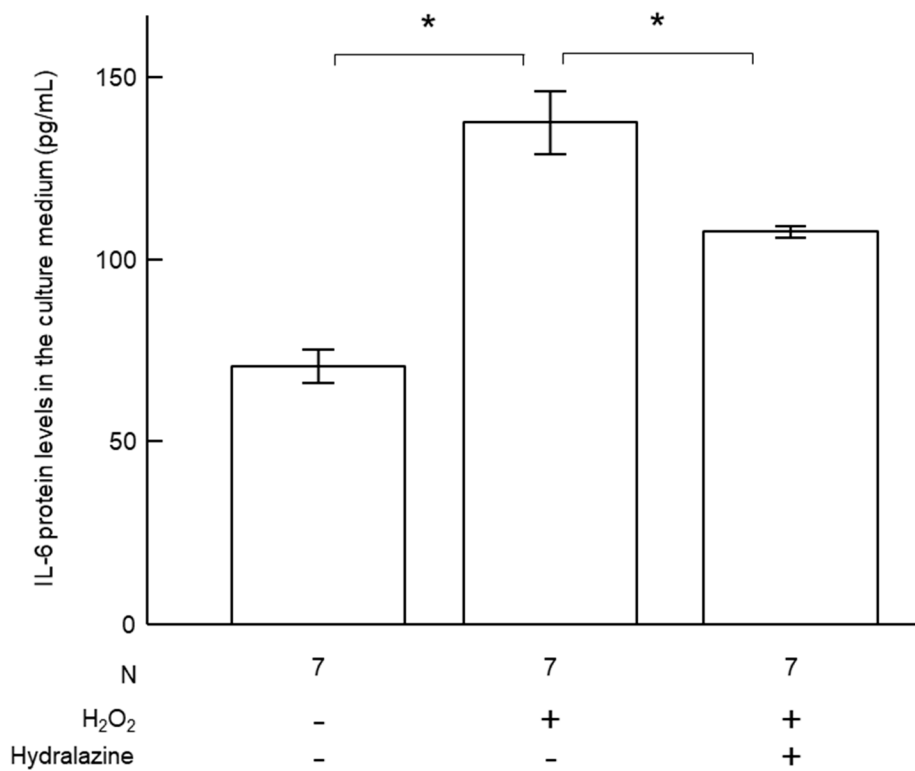

**Figure S1:** Effect of hydralazine on IL-6 protein levels in culture media. VSMCs were treated with H<sub>2</sub>O<sub>2</sub> (200  $\mu$ M) or co-treated with H<sub>2</sub>O<sub>2</sub> and hydralazine (100  $\mu$ M) for 24 h. IL-6 protein in the culture media was then quantified using ELISA. Error bars = standard error. Data were analyzed using Kruskal Wallis one-way ANOVA. \*  $P < 0.05$ . ELISA, enzyme-linked immunosorbent assay; H<sub>2</sub>O<sub>2</sub>, hydrogen peroxide; IL-6, interleukin 6; VSMCs, vascular smooth muscle cells.

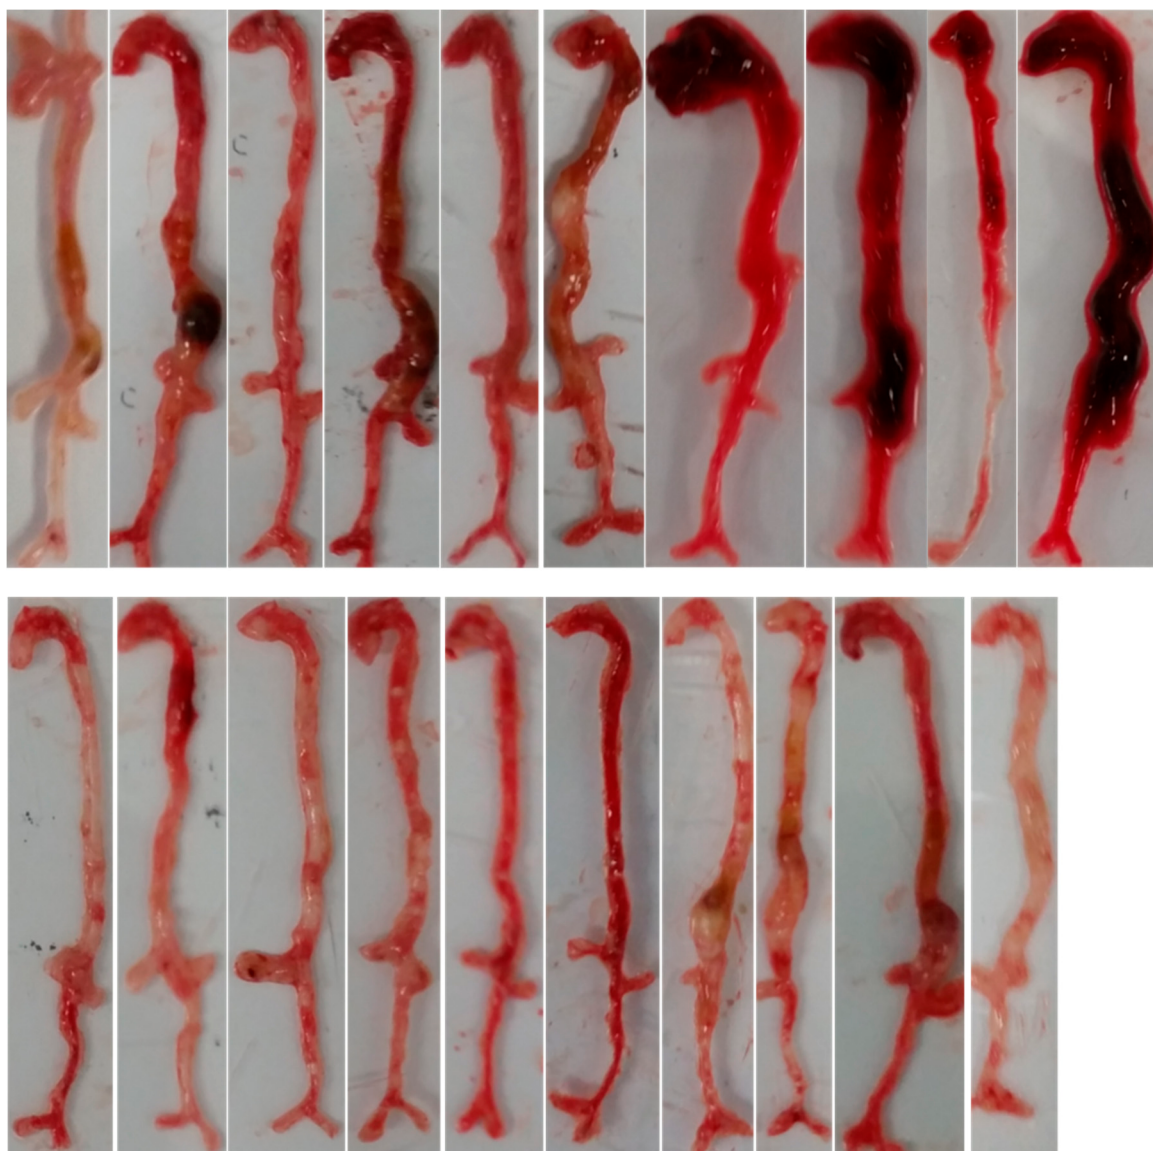

**Figure S2:** Aortic images. The top row images were the aortas of the control mice and the bottom row images were the aortas of the mice treated with hydralazine.

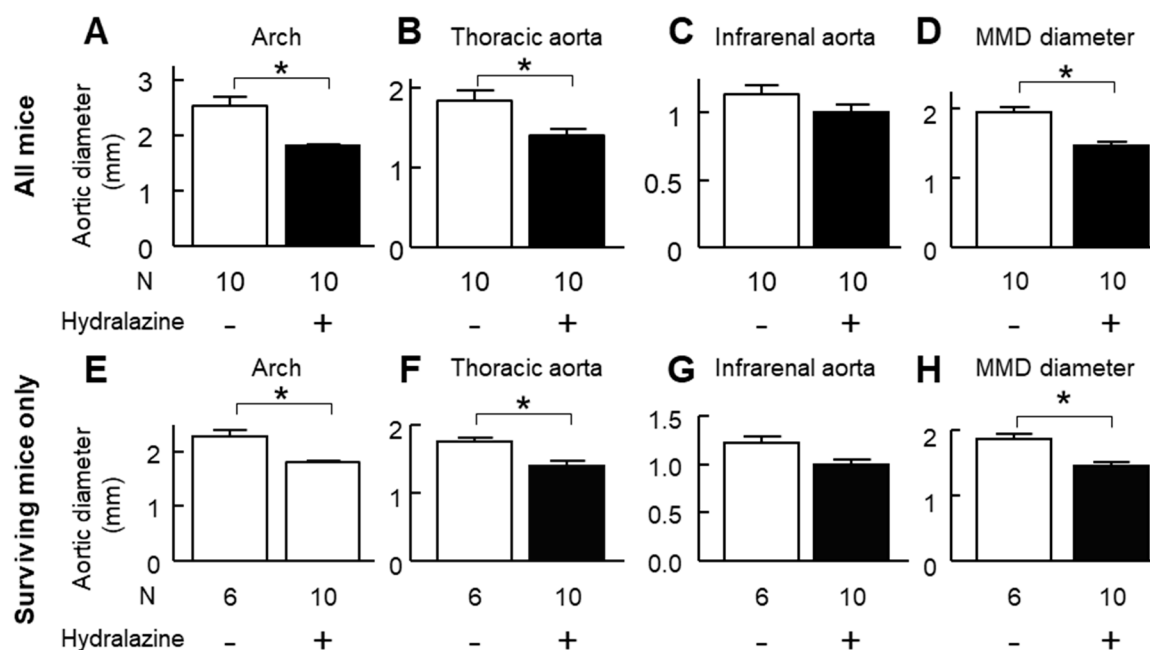

**Figure S3:** Effect of hydralazine treatment on aortic diameters of the aortic arch, thoracic aorta, infrarenal aorta, and mean maximum aortic diameter (MMD). **A-D**, All mice (surviving mice plus dead mice due to aortic rupture). **E-H**, Surviving mice. MMD was the mean of the maximum diameter of the following four aortic segments: aortic arch, descending thoracic aorta, suprarenal aorta, and infrarenal aorta. Error bars = standard error. Data were analyzed using the Mann-Whitney U test. \*  $P < 0.05$ .

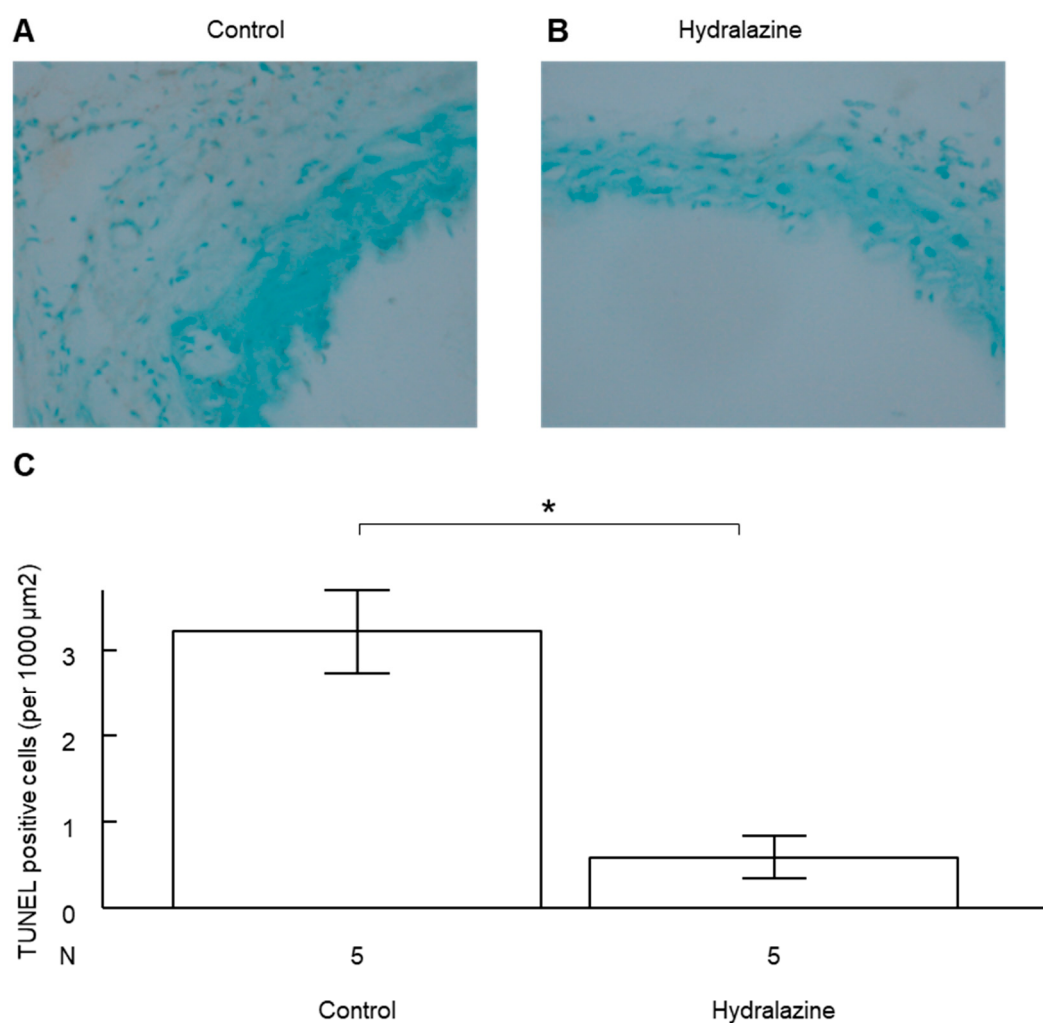

**Figure S4:** Effect of hydralazine treatment on apoptosis. Mice, treated with or without hydralazine (24 mg/kg/day), were sacrificed at the end of the 28-day subcutaneous infusion of angiotensin II (1  $\mu\text{g/kg}$  body/min). The suprarenal aortas were harvested, fixed, sectioned, and stained for apoptosis using the terminal deoxynucleotidyl transferase mediated dUTP nick-end labeling (TUNEL) assay. Nuclei were counterstained with methyl green. **A-B**, Representative images of TUNEL stained aortic sections (magnification, 40X) from the control (untreated, **A**) and hydralazine-treated mice (**B**). **C**, The mean TUNEL-positive cells per 1000  $\mu\text{m}^2$ . Error bars = standard error. Data were analyzed using the Mann-Whitney U test. \*  $P < 0.05$ .

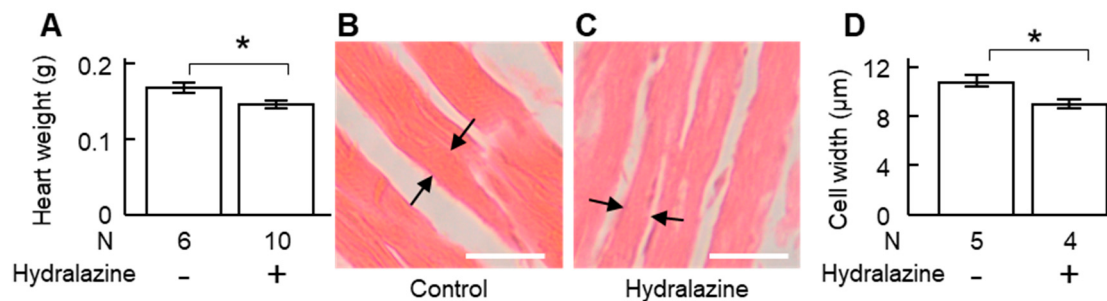

**Figure S5:** Effect of hydralazine treatment on heart weight and cardiomyocyte width. Hearts were harvested from the mice treated with or without hydralazine (24 mg/kg/day) at the end of the 28-day subcutaneous infusion of angiotensin II (1 μg/kg body/min). **A**, Heart weight of the surviving mice. **B-C**, Representative images of cardiomyocyte fibers of the control (untreated, **B**) and hydralazine-treated mice (**C**). Scale bar = 20 μm. Between the arrows: cardiomyocyte fibers. **D**, The mean width of cardiomyocytes. Error bars = standard error. Data were analyzed using the Mann-Whitney U test. \* P<0.05.
